# Supplementary material
Source: PubMed Central journal article supplement (PMC5411321)
Supplement: NIHMS827855-supplement-supplement_1.pdf [file NIHMS827855-supplement-supplement_1.pdf]

**Supplemental Table 1: Identification Step -- Performance Scale and 12-MSWS Benchmark Groups**

| MSWS12 Performance range          | 0-24.99 | 25-49.99 | 50-74.99 | 75-100 |
|-----------------------------------|---------|----------|----------|--------|
| Subject number                    | 54      | 32       | 33       | 40     |
| <b>Mobility, % subjects</b>       |         |          |          |        |
| Normal                            | 77.9    | 12.5     | 0        | 0      |
| Minimal Gait Disability           | 16.7    | 28.1     | 0        | 0      |
| Mild Gait Disability              | 1.9     | 37.5     | 36.4     | 5      |
| Occasional Use of Cane            | 0       | 18.8     | 51.5     | 30     |
| Frequent Use of Cane              | 3.7     | 0        | 6.1      | 27.5   |
| Severe Gait Disability            | 0       | 3.1      | 3        | 32.5   |
| Total Gait Disability             | 0       | 0        | 3        | 5      |
| <b>Hand Function, % subjects</b>  |         |          |          |        |
| Normal                            | 61.1    | 28.1     | 24.2     | 7.5    |
| Minimal Hand Disability           | 35.2    | 50       | 36.4     | 27.5   |
| Mild Hand Disability              | 3.7     | 18.8     | 24.2     | 30     |
| Moderate Hand Disability          | 0       | 3.1      | 12.1     | 15     |
| Severe Hand Disability            | 0       | 0        | 3        | 12.5   |
| Total Hand Disability             | 0       | 0        | 0        | 7.5    |
| <b>Vision, % subjects</b>         |         |          |          |        |
| Normal                            | 57.4    | 43.8     | 39.4     | 30     |
| Minimal Visual Disability         | 27.8    | 34.4     | 15.2     | 25     |
| Mild Visual Disability            | 14.8    | 12.5     | 33.3     | 20     |
| Moderate Visual Disability        | 0       | 6.3      | 9.1      | 20     |
| Severe Visual Disability          | 0       | 3.1      | 3        | 5      |
| <b>Fatigue, % subjects</b>        |         |          |          |        |
| Normal                            | 27.8    | 3.1      | 3        | 0      |
| Minimal Fatigue Disability        | 27.8    | 12.5     | 3        | 7.5    |
| Mild Fatigue Disability           | 29.6    | 21.9     | 21.2     | 17.5   |
| Moderate Fatigue Disability       | 11.1    | 43.8     | 24.2     | 32.5   |
| Severe Fatigue Disability         | 1.9     | 18.8     | 39.4     | 32.5   |
| Total Fatigue Disability          | 1.9     | 0        | 9.1      | 10     |
| <b>Cognitive, % subjects</b>      |         |          |          |        |
| Normal                            | 35.2    | 21.9     | 15.2     | 10     |
| Minimal Cognitive Disability      | 44.4    | 28.1     | 9.1      | 27.5   |
| Mild Cognitive Disability         | 16.7    | 28.1     | 27.3     | 17.5   |
| Moderate Cognitive Disability     | 1.9     | 15.6     | 30.3     | 30     |
| Severe Cognitive Disability       | 1.9     | 6.3      | 18.2     | 12.5   |
| Total Cognitive Disability        | 0       | 0        | 0        | 2.5    |
| <b>Bladder/Bowel, % subjects</b>  |         |          |          |        |
| Normal                            | 55.6    | 25       | 15.2     | 0      |
| Minimal Bladder/Bowel Disability  | 31.5    | 25       | 30.3     | 30     |
| Mild Bladder/Bowel Disability     | 7.4     | 31.3     | 27.3     | 25     |
| Moderate Bladder/Bowel Disability | 3.7     | 6.3      | 24.2     | 22.5   |
| Severe Bladder/Bowel Disability   | 1.9     | 12.5     | 3        | 17.5   |
| Total Bladder/Bowel Disability    | 0       | 0        | 0        | 5      |
